# Supplementary material
Source: PubMed Central journal article supplement (PMC3612614)
Supplement: 1300632110_pnas.201300632SI.pdf [file 1300632110_pnas.201300632SI.pdf]

# Supporting Information

Wallrapp et al. 10.1073/pnas.1300632110

## SI Methods

**Sequence Analysis.** In December 2010, we gathered sequences contained in the following six Pfam families (1): Terpene\_synth, Terpene\_synth\_C, Prenyltrans, TRI5, Polyprenyl\_synth, and SQS\_PSY. After removing redundant sequences, all-against-all pairwise BLAST e-values (2) were computed, and the resulting network was visualized at different e-value cut-offs in Cytoscape 2.8.2 (3). Based on sequence clustering and structural information, two superfamilies were defined: isoprenoid synthase type I and isoprenoid synthase type II. Sequences and associated metadata (including species information, catalytic specificity, and available crystal structures) were stored in the Structure-Function Linkage Database (SFLD) (4). Each superfamily is characterized by a multiple sequence alignment (MSA) and a Hidden Markov Model (HMM) based on the functionally and structurally characterized members of the superfamily. Superfamilies are classified further into subgroups, which also are characterized by an MSA and HMM. Among the subgroups in the isoprenoid synthase type I superfamily is the polyprenyl transferase-like subgroup of *E*-polyprenyl transferases (*E*-PTs), which by May 2011 consisted of 5,839 sequences. Automated protocols are used to add new sequence data from the National Center for Biotechnology Information Protein database on a regular basis.

Networks in this article were generated using Pythoscape (5). In the networks, nodes represent sequences, and edges correspond to sequence similarities that have BLAST e-values that are more significant than a specified cutoff. Because BLAST e-values are unidirectional (i.e., the e-value between sequence A and B is not identical to the e-value between sequence B and A), only the worst hit between two sequences was used. Networks are visualized using the yFiles organic layout provided within Cytoscape. Proteins and crystal structures applied in this study are identified by their Enzyme Function Initiative target ID (EFI-ID).

**Protein Expression and Purification.** *Expression for targets in pNIC-Bsa4.* The pNIC28-Bsa4 (6) vector containing the insert was transformed into BL21(DE3) *Escherichia coli* containing the pRIL plasmid (Stratagene) and was used to inoculate an overnight culture containing 25 ug/mL kanamycin and 34 ug/mL chloramphenicol. The culture was allowed to grow overnight at 37 °C in a shaking incubator. Then 1 mL of the overnight culture was used to inoculate 1 L of PASM-5052 autoinduction medium (7) containing 100 ug/mL kanamycin and 34 ug/mL chloramphenicol. The culture was placed in a LEX 48 airlift fermenter (Harbinger Biosciences) and incubated for 4 h at 37 °C and then overnight at 22 °C. The culture was harvested and pelleted by centrifugation and stored at –80°C until time of use.

*Purification of targets in pNIC-Bsa4.* Cells were resuspended in lysis buffer [20 mM Hepes (pH 7.5), 500 mM NaCl, 20 mM imidazole, and 10% (vol/vol) glycerol] and lysed by sonication. The lysate was clarified by centrifugation at 35,000 × *g* for 30 min. Clarified lysate was loaded onto an AKTExpress FPLC (GE Healthcare). Lysate was loaded onto a 1-mL HisTrap FF column (GE Healthcare), washed with 10 column volumes of lysis buffer, and eluted in buffer containing 20 mM Hepes (pH 7.5), 500 mM NaCl, 500 mM imidazole, and 10% (vol/vol) glycerol. The purified sample was loaded onto a HiLoad S200 16/60 PR gel filtration column (GE Healthcare), which was equilibrated with SECB gel filtration buffer [20 mM Hepes (pH 7.5), 150 mM NaCl, 10% glycerol, and 5 mM DTT]. Peak fractions were collected and allowed to incubate with 1 mg of TEV-protease overnight at 4 °C. TEV-protease and uncleaved protein were removed by

passing the over 1 mL of Ni Sepharose High Performance (GE Healthcare). Protein was analyzed by SDS/PAGE, snap frozen in liquid nitrogen, and stored at –80°C.

*Expression for targets in CHS30.* CHS30 vector, a C-terminal TEV-cleavable StrepII-6xHis-tag vector, containing the insert was transformed into BL21(DE3) *E. coli* containing the pRIL plasmid (Stratagene) and was used to inoculate an overnight culture containing 25 ug/mL kanamycin and 34 ug/mL chloramphenicol. The culture was allowed to grow overnight at 37 °C in a shaking incubator. Then 1 mL of the overnight culture was used to inoculate 1 L of PASM-5052 autoinduction medium (7) containing 100 ug/mL kanamycin and 34 ug/mL chloramphenicol. The culture was placed in a LEX 48 airlift fermenter and incubated at 37 °C for 4 h and then at 22 °C overnight. The culture was harvested and pelleted by centrifugation and stored at –80°C until time of use.

*Purification of targets in CHS30.* Cells were resuspended in lysis buffer [20 mM Hepes (pH 7.5), 500 mM NaCl, 20 mM imidazole, and 10% glycerol] and lysed by sonication. The lysate was clarified by centrifugation at 35,000 × *g* for 30 min. Clarified lysate was loaded onto an AKTExpress FPLC (GE Healthcare). Lysate was loaded onto a 5-mL Strep-Tactin column (IBA), washed with five column volumes of lysis buffer, and eluted in StrepB buffer [20 mM Hepes (pH 7.5), 500 mM NaCl, 20 mM imidazole, 10% glycerol, and 2.5 mM desthiobiotin]. The eluent was loaded onto a 1-mL HisTrap FF column (GE Healthcare), washed with 10 column volumes of lysis buffer, and eluted in buffer containing 20 mM Hepes (pH 7.5), 500 mM NaCl, 500 mM imidazole, and 10% (vol/vol) glycerol. The purified sample was loaded onto a HiLoad S200 16/60 PR gel filtration column, which was equilibrated with SECB gel filtration buffer [20 mM Hepes (pH 7.5), 150 mM NaCl, 10% glycerol, and 5 mM DTT]. Peak fractions were collected, and protein was analyzed by SDS/PAGE, snap frozen in liquid nitrogen, and stored at –80°C.

*Expression and Purification of targets in pSGX3.* Expression and purification of targets in pSGX3 were performed according to the methods described by Sauder et al. (8) and are given in Table S1.

**Protein Suspension.** All the 900 series targets were in a buffer of 10 mM Hepes (pH 7.5), 150 mM NaCl, 10 mM methionine, and 10% (vol/vol) glycerol. The two 500 series targets were in 20 mM Hepes (pH 7.8), 150 mM NaCl, 10% (vol/vol) glycerol, and 5 mM DTT.

**Crystallization, Ligand Soaking, and Collection of X-Ray Diffraction Data.** Proteins were crystallized by the sitting-drop vapor diffusion method. As a rule, the protein solutions (usually 0.3 or 1 mL) were mixed with an equal volume of a precipitant solution and equilibrated at room temperature (294 K) against the same precipitant solution in clear tape-sealed 96-well INTELLI-plates (102-0001-20; Art Robbins Instruments). Crystallization was performed using either a TECAN crystallization robot (TECAN US) or a PHOENIX crystallization robot (Art Robbins Instruments) and four types of commercial crystallization screens: the WIZARD I&II screen (Emerald BioSystems), the INDEX HT and the CRYSTAL SCREEN HT (both from Hampton Research), and the MCSG screen (Microlytic).

The appearance of protein crystals was monitored either by manual inspection or using a RockImager 1000 (Formulatrix) starting within 24 h of incubation and again at weeks 1, 2, 3, 5, 8, and 12.

Before harvesting and freezing, the protein crystals were prepared as described in Table S2. Most of protein crystals were dehydrated before freezing, as described below. Each protein

sample used for crystallization contained 10% (vol/vol) glycerol, so the crystallization drops with or without protein crystals already were supplemented with glycerol, which is a good cryoprotectant. However, the 10% (vol/vol) concentration often is too low for cryoprotection. To increase the glycerol concentration and dehydrate the protein crystals at the same time, we supplemented precipitant solutions with 20–25% (vol/vol) glycerol, and the crystallization drops then were equilibrated against these glycerol-containing solutions for 2–48 h. After incubation, the crystals were harvested using cryogenic loops (Hampton Research), quickly transferred into liquid nitrogen, and stored frozen in liquid nitrogen until X-ray analysis was conducted and/or X-ray diffraction data were collected. Where necessary, the crystallization conditions were optimized manually using 24-well Cryschem sitting-drop plates (Hampton Research). The final crystallization and cryoprotection conditions related to each X-ray crystal structure are listed in Table S2.

The X-ray diffraction data for the frozen crystals were collected at 100 K on the beamline  $\times 29A$  at the National Synchrotron Light Source, Brookhaven National Laboratory, Upton, NY, using a wavelength of either 0.979 Å [single anomalous difference (SAD) data] or 1.075 Å (native data). All diffraction data were processed and scaled with HKL2000 (9). The crystal structures reported here were determined either by Selenium-SAD using anomalous X-ray diffraction data for phasing or by molecular replacement using coordinates for similar structures from the Protein Data Bank (PDB) (listed in each PDB deposition as REMARK 200: STARTING MODEL) and PHASER MR software [the CCP4 program package suite (10)]. Each structure was refined using the program REFMAC (11), and the resulting models were rebuilt manually using COOT visualization and refinement software (12). The data collection and refinement statistics for these structures are listed in Tables S3–S7.

**Experimental and Computational Function Annotation. Determination of *in vitro* chain length/enzyme activity assay.** The assay mixture for *in vitro* determination of chain length and enzyme activity contained 35 mM Hepes (pH 7.6) 10 mM  $MgCl_2$ , 5 mM  $\beta$ -mercaptoethanol, 0.25% Triton X-100, 50  $\mu M$  dimethylallyl diphosphate (DMAPP), 50 or 200  $\mu M$  [ $^{14}C$ ] isopentenyl diphosphate (IPP) [specific activity (SA) = 5.5  $\mu Ci/\mu mol$ ] and 1–20  $\mu g$  of enzyme ( $\sim 0.03$ –0.6 nmols, assuming an average molecular mass of  $\sim 40$  kDa) in a final volume of 40  $\mu L$ . The reaction mixture was incubated at 30 °C for 2.5 h before being terminated by the addition of 5  $\mu L$  of 0.5 M EDTA. The radiolabeled polyprenyl diphosphate products were extracted with *n*-butanol (saturated with water), and solvent was removed on a SpeedVac (Thermo Scientific).

**Product analysis.** The polyprenyl diphosphate products were converted to the corresponding alcohols by incubating the residue with potato acid phosphatase in 200  $\mu L$  of 50 mM sodium acetate buffer (pH 4.5) containing 20% (vol/vol) *n*-propanol, 0.1% Triton X-100, and 1 mg (2 U, SA = 2 U/mg) of acid phosphatase at 37 °C for 16 h. The incubation mixtures were extracted with hexanes, and the solvent was removed using a SpeedVac. The polyprenyl alcohols were separated by reversed-phase silica gel TLC eluted with 9:1 or 19:1 acetone:water. The radiolabeled products were detected by phosphorimaging.

Images of the TLC plates, with each enzyme identified by its GenBank identification (GI) number, are presented in Dataset S1. The isoprenoid alcohols obtained from a given incubation were well resolved into a series of bands corresponding to the addition of an increasing number of isoprene units. The chain lengths were established by comparisons with standards synthesized from sagebrush farnesyl diphosphate (FPP) synthase. This enzyme, under forcing conditions, over-elongates up to hexaprenyl ( $C_{30}$ ) diphosphate when IPP is in excess (Standard in TLC 8). By aligning bands of the isoprenoid alcohols from sagebrush FPP synthase with those from GI 67866738, we obtained standards useful for chain lengths up to 10 isoprene units as  $C_{50}$  by the time-course experiment (see below).

**Protein structure preparation and homology modeling.** The template structures used for homology modeling were prepared with Schrodinger Protein Preparation Wizard. Missing loops and side chains were built with Prime (Schrodinger LLC). For template structures missing the S1 ligand (apo structures), we manually placed diphosphate and  $Mg^{2+}$  ions, based on the positions in the holo structures, and adjusted the conformations of the aspartates ligating the ions. We derived the alignments from PROMALS3D (13) for each query sequence against the template with the highest sequence identity available. In addition, we manually curated the resulting alignments to guarantee the correct adjustment of key residues (i.e., the aspartate-rich motifs) in the models. All models were treated as dimers throughout the computational setup to account for residues of the interface (of the opposite chain) influencing the elongation cavity and thus eventually the product specificity.

**Covalent docking.** We applied covalent ligand docking on derived structures using Prime. Here, the diphosphate group of the ligand was kept frozen in the S1 active site while the tail was docked flexibly into the elongation cavity. Side chains of residues within a 5-Å vicinity of the elongation cavity were treated as conformationally flexible. The modeled ligands for each structure were DMAPP, geranyl diphosphate, FPP, geranylgeranyl diphosphate (GGPP), and farnesylgeranyl diphosphate, ranging from 5–25 carbon atoms. The covalent docking algorithm returned a list of 100 ligand-receptor models ranked by complex energy. We computed the Lennard–Jones energy ( $E_{LJ}$ ) of the complex and the molecular mechanics/generalized-Born surface area (MMGBSA) binding energy for each of the top three models of each docking run, using the Surface Generalized Born (SGB) solvent model. Based on results in the test set, we exclusively applied the  $E_{LJ}$  of the complex as the scoring function for the chain-length prediction. For each enzyme, the docked ligand with the lowest relative energy score is considered the reactant of the last step of prenylation; thus the actual product of the reaction specific for this enzyme is predicted to be one  $C_5$  unit longer.

Experimentally determined vs. predicted product chain length of the training set, the set of 34 sequences that were screened and functionally assigned before the computational part of this study was completed (targets<sub>known</sub>), and the set of 40 sequences for which the functional assignment was not known during the computational prediction (targets<sub>blind</sub>) are given in Tables S8, S9, and S10, respectively.

- Punta M, et al. (2012) The Pfam protein families database. *Nucleic Acids Res* 40(1):290–302.
- Altschul SF, et al. (1997) Gapped BLAST and PSI-BLAST: A new generation of protein database search programs. *Nucleic Acids Res* 25(17):3389–3402.
- Cline MS, et al. (2007) Integration of biological networks and gene expression data using Cytoscape. *Nat Protoc* 2(10):2366–2382.
- Pegg SC, et al. (2006) Leveraging enzyme structure-function relationships for functional inference and experimental design: The structure-function linkage database. *Biochemistry* 45(8):2545–2555.
- Barber AE II, Babbitt PC (2012) Pythoscape: A framework for generation of large protein similarity networks. *Bioinformatics* 28(21):2845–2846.
- Savitsky P, et al. (2010) High-throughput production of human proteins for crystallization: The SGC experience. *J Struct Biol* 172(1):3–13.
- Studier FW (2005) Protein production by auto-induction in high density shaking cultures. *Protein Expr Purif* 41(1):207–234.
- Sauder MJ, et al. (2008) High Throughput Protein Production and Crystallization at NYSGXRC 426:561–575.
- Otwinowski Z, Minor W (1997) Processing of X-ray diffraction data collected in oscillation mode. *Methods Enzymol* 276:307–326.
- Collaborative Computational Project, Number 4 (1994) The CCP4 suite: Programs for protein crystallography. *Acta Crystallogr D Biol Crystallogr* 50(Pt 5):760–763.
- Murshudov GN, Vagin AA, Dodson EJ (1997) Refinement of macromolecular structures by the maximum-likelihood method. *Acta Crystallogr D Biol Crystallogr* 53(Pt 3):240–255.
- Emsley P, Cowtan K (2004) Coot: Model-building tools for molecular graphics. *Acta Crystallogr D Biol Crystallogr* 60(Pt 12 Pt 1):2126–2132.

13. Pei J, Kim B-H, Grishin NV (2008) PROMALS3D: A tool for multiple protein sequence and structure alignments. *Nucleic Acids Res* 36(7):2295–2300.
14. Chang TH, et al. (2010) Structure of a heterotetrameric geranyl pyrophosphate synthase from mint (*Mentha piperita*) reveals intersubunit regulation. *Plant Cell* 22(2):454–467.
15. Hosfield DJ, et al. (2004) Structural basis for bisphosphonate-mediated inhibition of isoprenoid biosynthesis. *J Biol Chem* 279(10):8526–8529.
16. Guo RT, et al. (2007) Bisphosphonates target multiple sites in both cis- and trans-prenyltransferases. *Proc Natl Acad Sci USA* 104(24):10022–10027.
17. Hsieh FL, Chang TH, Ko TP, Wang AH (2011) Structure and mechanism of an Arabidopsis medium/long-chain-length prenyl pyrophosphate synthase. *Plant Physiol* 155(3):1079–1090.
18. Tarshis LC, Proteau PJ, Kellogg BA, Sacchetti JC, Poulter CD (1996) Regulation of product chain length by isoprenyl diphosphate synthases. *Proc Natl Acad Sci USA* 93(26):15018–15023.

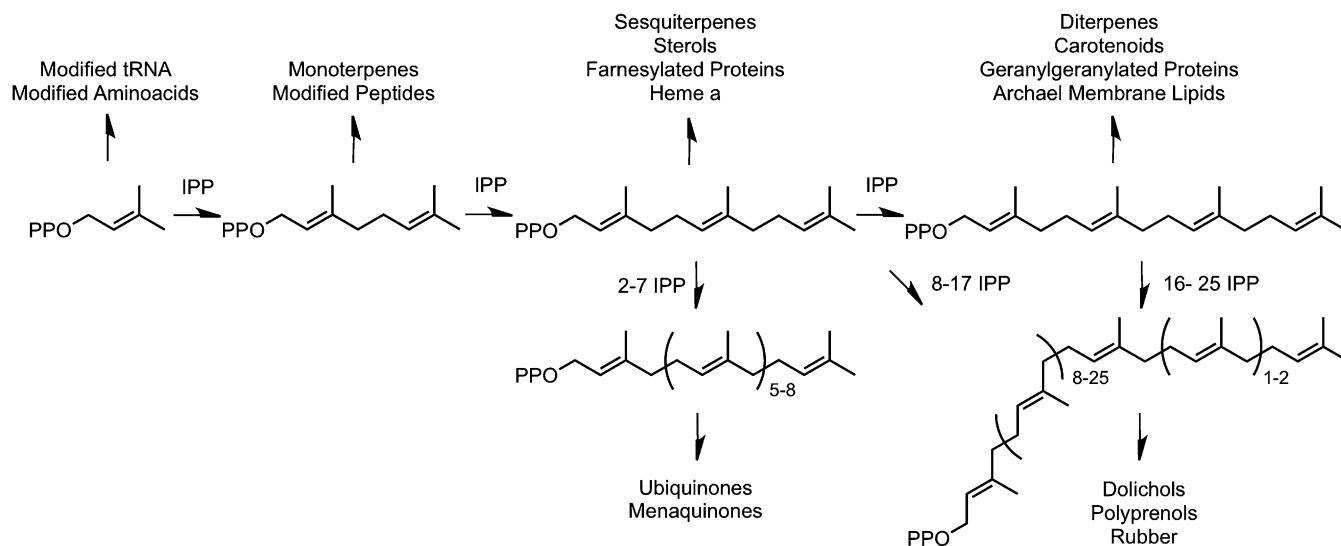

Fig. S1. Linear polyprenyltransferases serve as core for synthesis of a large variety of isoprenoids.

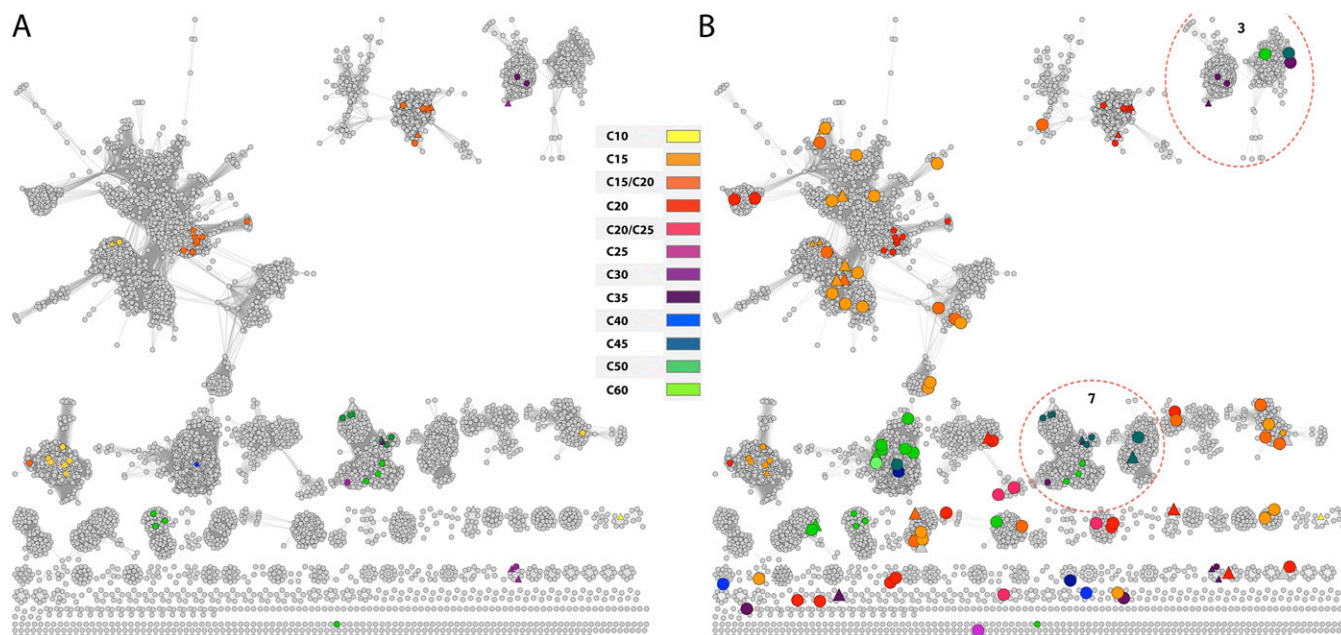

Fig. S2. Sequence similarity maps of the *E*-PTS subgroup with a BLAST e-value threshold of  $1e^{-70}$ . Nodes are colored according to functional assignment; triangular nodes represent crystal structures (including those with only different ligands). (A) Before this study, 93 sequences were annotated, and 69 crystal structures were solved. (B) After this study, 79 additional sequences were annotated (larger nodes), and 22 additional crystal structures were solved. Clusters 3 and 7 are highlighted by red circles.

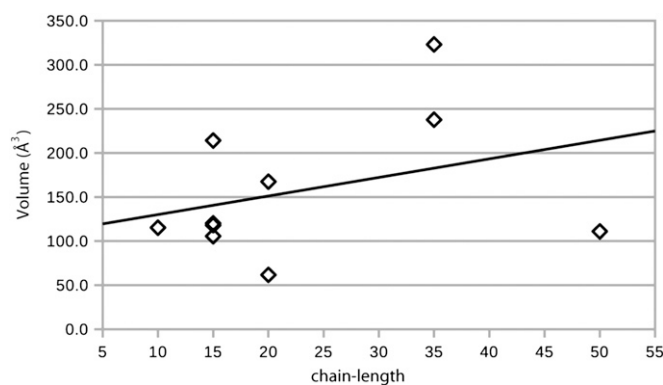

Fig. S3. Scatter plot of elongation-cavity volume vs. known product chain length of training set crystal structures.

Table S1. Protein purification vectors for the 79 E-PTs purified in this study

| EFI ID | GI        | Vector      | EFI ID | GI        | Vector      |
|--------|-----------|-------------|--------|-----------|-------------|
| 501393 | 34557991  | pNIC28-Bsa4 | 502322 | 15642935  | pNIC28-Bsa4 |
| 501400 | 46579760  | pNIC28-Bsa4 | 502349 | 14590908  | pNIC28-Bsa4 |
| 501401 | 39934591  | pNIC28-Bsa4 | 502360 | 55979982  | pNIC28-Bsa4 |
| 501414 | 11499146  | pNIC28-Bsa4 | 900386 | 34540567  | pSGX3       |
| 501418 | 16800468  | CHS30       | 900387 | 60682991  | pSGX3       |
| 501422 | 28378303  | CHS30       | 900388 | 15640461  | pSGX3       |
| 501426 | 17546941  | pNIC28-Bsa4 | 900392 | 53711383  | pSGX3       |
| 501432 | 33600896  | CHS30       | 900395 | 148993815 | pSGX3       |
| 501449 | 15805956  | CHS30       | 900396 | 153799383 | pSGX3       |
| 501455 | 16081558  | pNIC28-Bsa4 | 900397 | 23308797  | pSGX3       |
| 501461 | 21227869  | CHS30       | 900398 | 58337602  | pSGX3       |
| 501462 | 28377915  | pNIC28-Bsa4 | 900400 | 104774286 | pSGX3       |
| 501472 | 29831407  | CHS30       | 900401 | 125624487 | pSGX3       |
| 501473 | 29829539  | pNIC28-Bsa4 | 900402 | 15640906  | pSGX3       |
| 501943 | 83764459  | pNIC28-Bsa4 | 900403 | 29375563  | pSGX3       |
| 501944 | 68489506  | pNIC28-Bsa4 | 900404 | 52842862  | pSGX3       |
| 501947 | 50309979  | pNIC28-Bsa4 | 900407 | 118468511 | pSGX3       |
| 501949 | 149238027 | CHS30       | 900409 | 21218742  | pSGX3       |
| 501952 | 56551751  | pNIC28-Bsa4 | 900411 | 21223617  | pSGX3       |
| 501954 | 21673095  | CHS30       | 900416 | 29376566  | pSGX3       |
| 501956 | 154483652 | CHS30       | 900417 | 57833856  | pSGX3       |
| 501957 | 254302823 | CHS30       | 900418 | 16126308  | pSGX3       |
| 501958 | 24215915  | pNIC28-Bsa4 | 900419 | 29377703  | pSGX3       |
| 501961 | 53804815  | CHS30       | 900420 | 308388199 | pSGX3       |
| 501964 | 83594313  | CHS30       | 900421 | 16131077  | pSGX3       |
| 501972 | 29840764  | pNIC28-Bsa4 | 900422 | 39934115  | pSGX3       |
| 501974 | 18310802  | pNIC28-Bsa4 | 900423 | 67866738  | pSGX3       |
| 501976 | 58578715  | pNIC28-Bsa4 | 900425 | 77464324  | pSGX3       |
| 501980 | 87120692  | CHS30       | 900463 | 21225056  | pSGX3       |
| 501981 | 154151748 | pNIC28-Bsa4 | 900464 | 57238655  | pSGX3       |
| 501984 | 83945403  | pNIC28-Bsa4 | 900465 | 116334218 | pSGX3       |
| 501986 | 63034220  | pNIC28-Bsa4 | 900466 | 77862362  | pSGX3       |
| 501992 | 126458776 | CHS30       | 900467 | 116333612 | pSGX3       |
| 501993 | 126460364 | CHS30       | 900468 | 293372070 | pSGX3       |
| 501995 | 291005007 | CHS30       | 900469 | 52842540  | pSGX3       |
| 501998 | 152991761 | CHS30       | 900470 | 15645545  | pSGX3       |
| 502000 | 300633355 | CHS30       | 900471 | 19551716  | pSGX3       |
| 502006 | 40062988  | CHS30       | 900472 | 23308904  | pSGX3       |
| 502008 | 58584994  | pNIC28-Bsa4 | 900473 | 70732810  | pSGX3       |
| 502009 | 15837263  | CHS30       |        |           |             |

**Table S2. Crystallization conditions for the 19 structures of distinct polyprenyl transferases solved and applied in this study**

| PDB  | Target ID                      | Ligand                                                          | Treatment of crystals before freezing                                                                                     | Crystallization conditions                                                                                               |
|------|--------------------------------|-----------------------------------------------------------------|---------------------------------------------------------------------------------------------------------------------------|--------------------------------------------------------------------------------------------------------------------------|
| 3PDE | EFI-900467<br>(NYSGXRC-20032b) | Glycerol, IPP, Mg <sup>2+</sup>                                 | Dehydrated for 24 h in precipitant solution with 100 mM MgCl <sub>2</sub> and IPP powder                                  | 0.1 M sodium acetate, pH 4.5, 25% PEG 3350, 10% glycerol, vapor diffusion, sitting drop, 294K                            |
| 3PKO | EFI-900465<br>(NYSGXRC-20019c) | Citric acid, glycerol                                           | Direct freeze in liquid N <sup>2</sup>                                                                                    | 1.8 M ammonium (tri)citrate, pH 7, 10% glycerol, vapor diffusion, sitting drop, 294K                                     |
| 3Q1O | EFI-900470<br>(NYSGXRC-20030a) | IPP, Mg <sup>2+</sup> , SO <sub>4</sub> <sup>2-</sup>           | Crystals incubated in 2 M Li <sub>2</sub> SO <sub>4</sub> , 10% glycerol, 5 mM MgCl <sub>2</sub> and IPP powder for 1.5 h | 0.1 M Hepes, pH 7.5, 2,000 mM ammonium sulfate, 10% glycerol, vapor diffusion, sitting drop, 294K                        |
| 3QQV | EFI-900472<br>(NYSGXRC-20008a) | Glycerol, IPP, Mg <sup>2+</sup> , unknown                       | Dehydrated for 24 h in precipitant solution with 100 mM MgCl <sub>2</sub> and IPP powder                                  | 0.15 M potassium bromide, pH 7.5, 30% PEG MME2000, 10% glycerol, vapor diffusion, sitting drop, 294K                     |
| 3Q2Q | EFI-900471<br>(NYSGXRC-20015a) | Ca <sup>2+</sup> , glycerol, IPP                                | Dry IPP was added to the drop and incubated for 24 h                                                                      | 0.1 M sodium acetate, pH 4.5, 30% PEG 400, 200 mM calcium acetate, 10% glycerol, vapor diffusion, sitting drop, 294K     |
| 3OYR | EFI-900420<br>(NYSGXRC-20011b) | Ca <sup>2+</sup> , IPP, diphosphate                             | Dry IPP crystals added to the drop, direct freeze after 2 h of dehydration                                                | 0.1 M Mes, pH 6.0, 20% PEG 8K, 200 mM calcium acetate monohydrate, 10% glycerol, vapor diffusion, sitting drop, 294K     |
| 3TS7 | EFI-501961                     | PO <sub>4</sub> <sup>2-</sup>                                   | Crystals were soaked in the precipitant with 25% glycerol (vol/vol)                                                       | 0.1 M Tris-HCL, 2 M ammonium phosphate monobasic, pH 8.5, vapor diffusion, sitting drop, 294K                            |
| 3UCA | EFI-501974                     | Glycerol, PO <sub>4</sub> <sup>2-</sup>                         | Well B2, MCSG-1 screen, direct freeze                                                                                     | 0.1 M Bis-Tris, 0.2 M sodium chloride, pH 5.5, 25% PEG 3350, vapor diffusion, sitting drop, 294K                         |
| 3LVS | EFI-900468<br>(NYSGXRC-20032c) | Glycerol, PO <sub>4</sub> <sup>2-</sup>                         | 30% glycerol was used as a cryoprotectant, short soak                                                                     | 20% PEG 8000, 50 mM potassium dihydrogen phosphate, 10% glycerol, vapor diffusion, sitting drop, 294K                    |
| 3NF2 | EFI-900463<br>(NYSGXRC-20006e) | SO <sub>4</sub> <sup>2-</sup>                                   | Direct freeze                                                                                                             | 0.1 M phosphate citrate, pH 4.2, 2 M ammonium sulfate, 10% glycerol, vapor diffusion, sitting drop, 294K                 |
| 3MZV | EFI-900466<br>(NYSGXRC-20011c) | None                                                            | Dehydrated for 2.5 h                                                                                                      | 100 mM Mes pH 6.5, 30% PEG MME 5K, 200 mM ammonium sulfate, vapor diffusion, temperature 294K                            |
| 3P8R | EFI-900402<br>(NYSGXRC-20032e) | None                                                            | Dehydrated for 24 h                                                                                                       | 0.1 M Bis-Tris, pH 6.5, 25% PEG 3350, 200 mM ammonium acetate, 10% glycerol, vapor diffusion, sitting drop, 294K         |
| 3P8L | EFI-900403<br>(NYSGXRC-20032a) | None                                                            | Dehydrated for 24 h                                                                                                       | 0.1 M Bis-Tris, pH 6.5, 25% PEG 3350, 200 mM sodium chloride, 10% glycerol, vapor diffusion, sitting drop, 294K          |
| 3LOM | EFI-900469<br>(NYSGXRC-20026a) | PO <sub>4</sub> <sup>2-</sup>                                   | Dehydrated for 3 h                                                                                                        | 0.1 M phosphate citrate, pH 4.2, 200 mM lithium sulfate, 20% PEG 1000, 10% glycerol, vapor diffusion, sitting drop, 294K |
| 3P41 | EFI-900473<br>(NYSGXRC-20027b) | Cl <sup>-</sup> , glycerol, IPP, Mg <sup>2+</sup> , diphosphate | Dry IPP crystals added to drop, direct freeze after 48 h of dehydration                                                   | 0.1 M sodium cocodylate, pH 6.5, 20% PEG 8K, 200 mM magnesium acetate, vapor diffusion, sitting drop, 294K               |
| 4FP4 | EFI-501993                     | Ger, unknown                                                    | Direct freeze in liquid N <sup>2</sup> .                                                                                  | 0.1 M Hepes, 10% PEG 6000, pH 7.5, 5% MPD                                                                                |
| 4F62 | EFI-501980                     | Glycerol, SO <sub>4</sub> <sup>2-</sup>                         | Reservoir solution, 20% glycerol                                                                                          | 0.1 M sodium chloride, 0.1 M Hepes, pH 7.5, 1.6 M ammonium sulfate, vapor diffusion, sitting drop, 298K                  |
| 4DHD | EFI-501992                     | Acetate, PO <sub>4</sub> <sup>2-</sup>                          | Dehydrated for 3 h                                                                                                        | 0.1 M malic acid, pH 7.0, 30% PEG 3350, 10% glycerol, vapor diffusion, sitting drop, 294K                                |
| 3RMG | EFI-900427                     | None                                                            | Direct freeze                                                                                                             | 0.1 M sodium acetate, pH 4.5, 25% PEG 3350, 10% glycerol, vapor diffusion, sitting drop, 294K                            |

**Table S3. Data collection and refinement statistics for crystals of distinct polyprenyl transferases 3PDE, 3PKO, 3Q1O, and 3QQV**

|                                        | PDB identifier                  |                       |                                                       |                                                  |
|----------------------------------------|---------------------------------|-----------------------|-------------------------------------------------------|--------------------------------------------------|
|                                        | 3PDE                            | 3PKO                  | 3Q1O                                                  | 3QQV                                             |
| Space group                            | P 1                             | P 21 21 21            | P 43 21 2                                             | P 31 2 1                                         |
| Unit cell dimension (Å)                |                                 |                       |                                                       |                                                  |
| a                                      | 48.54                           | 50.10                 | 191.87                                                | 123.64                                           |
| b                                      | 51.17                           | 106.71                | 191.87                                                | 123.64                                           |
| c                                      | 126.57                          | 132.60                | 127.05                                                | 51.82                                            |
| Cell angles (°)                        |                                 |                       |                                                       |                                                  |
| $\alpha$                               | 95.75                           | 90.00                 | 90.00                                                 | 90.00                                            |
| $\beta$                                | 91.71                           | 90.00                 | 90.00                                                 | 90.00                                            |
| $\gamma$                               | 105.31                          | 90.00                 | 90.00                                                 | 120.00                                           |
| Molecules per ASU                      | 4                               | 2                     | 4                                                     | 1                                                |
| Solvent content                        | 45.42                           | 47.70                 | 73.80                                                 | 55.80                                            |
| Matthew's coefficient                  | 2.25                            | 2.35                  | 4.70                                                  | 2.78                                             |
| Ligands                                | Glycerol, IPP, Mg <sup>2+</sup> | Citric acid, glycerol | IPP, Mg <sup>2+</sup> , SO <sub>4</sub> <sup>2-</sup> | Glycerol, IPP, Mg <sup>2+</sup> , unknown ligand |
| X-ray source                           | NSLS X29A                       | NSLS X29A             | NSLS X29A                                             | NSLS X29A                                        |
| Wavelength                             | 1.075                           | 0.9789                | 0.979                                                 | 1.075                                            |
| Method of structure solution           | MR                              | SAD                   | SAD                                                   | MR                                               |
| Resolution                             | 40.00–1.75                      | 50.00–1.98            | 40.00–2.30                                            | 40.00–2.00                                       |
| Resolution/refinement                  | 40.00–1.75                      | 50.00–1.98            | 40.00–2.40                                            | 40.00–2.00                                       |
| Completeness (%)                       | 97.0 (95.8)                     | 99.9 (98.0)           | 100.0 (100.0)                                         | 99.9 (100.0)                                     |
| I/sigma (I)                            | 4.50 (1.30)                     | 8.00 (1.40)           | 8.30 (0.6)                                            | 7.10 (0.90)                                      |
| R <sub>sym</sub>                       | 0.085 (0.650)                   | 0.088 (0.810)         | 0.110 (NULL)                                          | 0.100 (NULL)                                     |
| R <sub>work</sub> (R <sub>free</sub> ) | 17.2 (20.4)                     | 18.5 (23.0)           | 21.5 (24.3)                                           | 20.9 (25.2)                                      |
| R <sub>free</sub> reflections (%)      | 3419 (3.0%)                     | 1557 (3.1%)           | 2772 (3.0%)                                           | 975 (3.2%)                                       |
| Average B factor                       | 26.02                           | 45.51                 | 63.15                                                 | 59.99                                            |
| rmsd                                   |                                 |                       |                                                       |                                                  |
| Bond lengths                           | 0.011                           | 0.012                 | 0.007                                                 | 0.008                                            |
| Bond angles                            | 1.368                           | 1.254                 | 1.133                                                 | 1.141                                            |
| Number of solvent molecules            | 974                             | 258                   | 224                                                   | 146                                              |

Numbers in parenthesis are those for the high-resolution shell.

**Table S4. Data collection and refinement statistics for crystals of distinct polyprenyl transferases 3Q2Q, 3OYR, 3T57, and 3UCA**

|                                        | PDB identifier                   |                                       |                               |                                         |
|----------------------------------------|----------------------------------|---------------------------------------|-------------------------------|-----------------------------------------|
|                                        | 3Q2Q                             | 3OYR                                  | 3T57                          | 3UCA                                    |
| Space group                            | P 32 2 1                         | P 21 21 21                            | P 42 21 2                     | P 31 2 1                                |
| Unit cell dimension (Å)                |                                  |                                       |                               |                                         |
| a                                      | 71.66                            | 72.89                                 | 114.59                        | 70.12                                   |
| b                                      | 71.66                            | 72.44                                 | 114.59                        | 70.12                                   |
| c                                      | 150.92                           | 125.85                                | 113.19                        | 228.14                                  |
| Cell angles (°)                        |                                  |                                       |                               |                                         |
| α                                      | 90.00                            | 90.00                                 | 90.00                         | 90.00                                   |
| β                                      | 90.00                            | 90.00                                 | 90.00                         | 90.00                                   |
| γ                                      | 120.00                           | 90.00                                 | 90.00                         | 120.00                                  |
| Molecules per ASU                      | 1                                | 2                                     | 2                             | 2                                       |
| Solvent content                        | 57.09                            | 45.14                                 | 52.47                         | 44.86                                   |
| Matthew's coefficient                  | 2.86                             | 2.24                                  | 2.59                          | 2.23                                    |
| Ligands                                | Ca <sup>2+</sup> , glycerol, IPP | Ca <sup>2+</sup> , IPP, pyrophosphate | PO <sub>4</sub> <sup>2-</sup> | glycerol, PO <sub>4</sub> <sup>2-</sup> |
| X-ray source                           | NSLS X29A                        | NSLS X29A                             | NSLS X29A                     | NSLS X29A                               |
| Wavelength                             | 0.9789                           | 0.979                                 | 1.075                         | 1.075                                   |
| Method of structure solution           | MR                               | SAD                                   | MR                            | MR                                      |
| Resolution                             | 40.00–1.90                       | 40.00–2.00                            | 50.00–1.94                    | 50.00–2.00                              |
| Reflections                            | 36,231                           | 45,715                                | 56,269                        | 45,199                                  |
| Completeness (%)                       | 99.8 (100.0)                     | 91.9 (96.8)                           | 94.0 (96.6)                   | 99.8 (100.0)                            |
| I/sigma (I)                            | 10.10 (0.90)                     | 6.10 (1.00)                           | 7.00 (1.10)                   | 5.70 (1.10)                             |
| R <sub>sym</sub>                       | 0.075 (NULL)                     | 0.074 (NULL)                          | 0.131 (0.950)                 | 0.132 (NULL)                            |
| R <sub>work</sub> (R <sub>free</sub> ) | 18.4 (21.8)                      | 19.9 (24.7)                           | 22.1 (26.6)                   | 19.1 (23.0)                             |
| R <sub>free</sub> reflections (%)      | 1118 (3.1%)                      | 1283 (3.1%)                           | 1631 (3.1%)                   | 1402 (3.1%)                             |
| Average B factor                       | 51.09                            | 48.83                                 | 47.28                         | 47.28                                   |
| rmsd                                   |                                  |                                       |                               |                                         |
| Bond lengths                           | 0.009                            | 0.011                                 | 0.011                         | 0.01                                    |
| Bond angles                            | 1.03                             | 1.354                                 | 1.292                         | 1.109                                   |
| Number of solvent molecules            | 204                              | 211                                   | 172                           | 213                                     |

Numbers in parenthesis are those for the high-resolution shell.

**Table S5. Data collection and refinement statistics for crystals of distinct polyprenyl transferases solved 3LVS, 3NF2, 3MZV, and 3P8R**

|                                        | PDB identifier                          |                               |               |              |
|----------------------------------------|-----------------------------------------|-------------------------------|---------------|--------------|
|                                        | 3LVS                                    | 3NF2                          | 3MZV          | 3P8R         |
| Space group                            | P 21 21 21                              | P 31 2 1                      | C 1 2 1       | P 61 2 2     |
| Unit cell dimension (Å)                |                                         |                               |               |              |
| a                                      | 54.46                                   | 68.05                         | 123.46        | 79.59        |
| b                                      | 89.46                                   | 68.05                         | 90.25         | 79.59        |
| c                                      | 132.77                                  | 147.64                        | 80.17         | 215.32       |
| Cell angles (°)                        |                                         |                               |               |              |
| α                                      | 90.00                                   | 90.00                         | 90.00         | 90.00        |
| β                                      | 90.00                                   | 90.00                         | 125.76        | 90.00        |
| γ                                      | 90.00                                   | 120.00                        | 90.00         | 120.00       |
| Molecules per ASU                      | 2                                       | 1                             | 2             | 1            |
| Solvent content                        | 53.12                                   | 53.12                         | 49.11         | 58.50        |
| Matthew's coefficient                  | 2.62                                    | 2.62                          | 2.42          | 2.96         |
| Ligands                                | Glycerol, PO <sub>4</sub> <sup>2-</sup> | SO <sub>4</sub> <sup>2-</sup> | None          | None         |
| X-ray source                           | NSLS X29A                               | NSLS X29A                     | NSLS X29A     | NSLS X29A    |
| Wavelength                             | 0.9791                                  | 0.9789                        | 0.97958       | 0.979        |
| Method of structure solution           | SAD                                     | SAD                           | SAD           | SAD          |
| Resolution                             | 40.00–2.15                              | 40.00–2.20                    | 30.00–1.90    | 40.00–2.34   |
| Resolution/refinement                  | 40.00–2.15                              | 40.00–2.20                    | 30.00–1.90    | 40.00–2.50   |
| Completeness (%)                       | 99.8 (100.0)                            | 96.1 (69.6)                   | 99.9 (100.0)  | 99.8 (99.7)  |
| I/sigma (I)                            | 5.90 (0.90)                             | 10.10 (1.00)                  | 13.00 (3.00)  | 10.70 (0.90) |
| R <sub>sym</sub>                       | 0.085 (0.790)                           | 0.076 (NULL)                  | 0.064 (0.479) | 0.064 (NULL) |
| R <sub>work</sub> (R <sub>free</sub> ) | 21.8 (25.0)                             | 23.3 (27.5)                   | 19.4 (22.1)   | 23.0 (29.0)  |
| R <sub>free</sub> reflections (%)      | 1112 (3.1%)                             | 652 (3.2%)                    | 2837 (5.1%)   | 464 (3.2%)   |
| Average B factor                       | 61.88                                   | 57.07                         | 46.95         | 82.5         |
| rmsd                                   |                                         |                               |               |              |
| Bond lengths                           | 0.009                                   | 0.008                         | 0.018         | 0.007        |
| Bond angles                            | 1.232                                   | 1.183                         | 1.507         | 1.006        |
| Number of solvent molecules            | 125                                     | 41                            | 305           | 35           |

Numbers in parenthesis are those for the high-resolution shell.



**Table S6. Data collection and refinement statistics for crystals of distinct polyprenyl transferases 3P8L, 3LOM, 3P41, and 4FP4**

|                                        | PDB identifier |                               |                                                                   |                          |
|----------------------------------------|----------------|-------------------------------|-------------------------------------------------------------------|--------------------------|
|                                        | 3P8L           | 3LOM                          | 3P41                                                              | 4FP4                     |
| Space group                            | P 21 21 21     | P 43 21 2                     | P 31 2 1                                                          | P 1 21 1                 |
| Unit cell dimension (Å)                |                |                               |                                                                   |                          |
| a                                      | 53.86          | 94.78                         | 48.36                                                             | 46.96                    |
| b                                      | 100.53         | 94.78                         | 48.36                                                             | 115.42                   |
| c                                      | 122.66         | 148.35                        | 208.59                                                            | 53.14                    |
| Cell angles (°)                        |                |                               |                                                                   |                          |
| $\alpha$                               | 90.00          | 90.00                         | 90.00                                                             | 90.00                    |
| $\beta$                                | 90.00          | 90.00                         | 90.00                                                             | 110.84                   |
| $\gamma$                               | 90.00          | 90.00                         | 120.00                                                            | 90.00                    |
| Molecules per ASU                      | 2              | 2                             | 1                                                                 | 2                        |
| Solvent content                        | 51.20          | 48.91                         | 43.65                                                             | 41.38                    |
| Matthew's coefficient                  | 2.52           | 2.41                          | 2.18                                                              | 2.10                     |
| Ligands                                | None           | PO <sub>4</sub> <sup>2-</sup> | Cl <sup>-</sup> , glycerol, IPP, Mg <sup>2+</sup> , pyrophosphate | Geranylgeranyl, UNX, UNL |
| X-ray source                           | NSLS X29A      | NSLS X29A                     | NSLS X29A                                                         | NSLS X29A                |
| Wavelength                             | 0.979          | 0.9791                        | 1.075                                                             | 1.075                    |
| Method of structure solution           | SAD            | SAD                           | MR                                                                | MR                       |
| Resolution                             | 40.00–1.90     | 40.00–2.30                    | 40.00–1.76                                                        | 40.00–2.00               |
| Resolution/refinement                  | 40.00–2.00     | 40.00–2.30                    | 20.00–1.76                                                        | 38.57–2.00               |
| Completeness (%)                       | 99.9 (99.6)    | 99.9 (100.0)                  | 97.2 (78.8)                                                       | 99.6 (99.3)              |
| I/sigma (I)                            | 8.20 (0.90)    | 6.00 (2.20)                   | 6.30 (1.50)                                                       | 7.90 (1.80)              |
| R <sub>sym</sub>                       | 0.068 (NULL)   | 0.096 (0.550)                 | 0.088 (0.690)                                                     | 0.064 (0.62)             |
| R <sub>work</sub> (R <sub>free</sub> ) | 20.2 (24.6)    | 22.2 (26.7)                   | 19.5 (22.3)                                                       | 18.6 (22.8)              |
| R <sub>free</sub> reflections (%)      | 1397 (3.1%)    | 973 (3.2%)                    | 918 (3.2%)                                                        | 1115 (3.2%)              |
| Average B factor                       | 54.98          | 61.49                         | 34.75                                                             | 61.70                    |
| rmsd                                   |                |                               |                                                                   |                          |
| Bond lengths                           | 0.01           | 0.008                         | 0.012                                                             | 0.008                    |
| Bond angles                            | 1.231          | 1.218                         | 1.417                                                             | 1.342                    |
| Number of solvent molecules            | 168            | 135                           | 142                                                               | 99                       |

Numbers in parenthesis are those for the high-resolution shell.

**Table S7. Data collection and refinement statistics for crystals of distinct polyprenyl transferases 4F62, 4DHD, and 3RMG**

|                                        | PDB identifier                          |                                        |              |
|----------------------------------------|-----------------------------------------|----------------------------------------|--------------|
|                                        | 4F62                                    | 4DHD                                   | 3RMG         |
| Space group                            | P 32 2 1                                | C 2 2 21                               | P 21         |
| Unit cell dimension (Å)                |                                         |                                        |              |
| a                                      | 96.49                                   | 61.40                                  | 44.62        |
| b                                      | 96.49                                   | 89.27                                  | 111.41       |
| c                                      | 156.39                                  | 149.54                                 | 83.38        |
| Cell angles (°)                        |                                         |                                        |              |
| α                                      | 90.00                                   | 90.00                                  | 90.00        |
| β                                      | 90.00                                   | 90.00                                  | 92.56        |
| γ                                      | 120.00                                  | 90.00                                  | 90.00        |
| Molecules per ASU                      | 2                                       | 1                                      | 2            |
| Solvent content                        | 58.91                                   | 52.06                                  | 56.20        |
| Matthew's coefficient                  | 2.99                                    | 2.56                                   | 2.81         |
| Ligands                                | Glycerol, SO <sub>4</sub> <sup>2-</sup> | Acetate, PO <sub>4</sub> <sup>2-</sup> | None         |
| X-ray source                           | NSLS X29A                               | NSLS X29A                              | NSLS X29A    |
| Wavelength                             | 0.979                                   | 1.075                                  | 0.979        |
| Method of structure solution           | MR                                      | MR                                     | SAD          |
| Resolution                             | 41.06–2.10                              | 70.00–1.65                             | 50.00–2.20   |
| Resolution/refinement                  | 41.00–2.10                              | 50.00–1.65                             | 50.00–2.20   |
| Completeness (%)                       | 100.0 (100.0)                           | 93.8 (100.0)                           | 99.9 (100.0) |
| I/σ(I)                                 | 10.3 (NULL)                             | 9.90 (3.8)                             | 9.10 (1.20)  |
| R <sub>sym</sub>                       | NULL (0.751)                            | 0.117 (0.360)                          | 0.070 (NULL) |
| R <sub>work</sub> (R <sub>free</sub> ) | 17.8 (20.3)                             | 18.2 (21.3)                            | 21.50 (25.8) |
| R <sub>free</sub> reflections (%)      | 1897 (4.0%)                             | 1430 (3.1%)                            | 1120 (3.1%)  |
| Average B factor                       | 53.50                                   | 27.39                                  | 66.60        |
| rmsd                                   |                                         |                                        |              |
| Bond lengths                           | 0.007                                   | 0.009                                  | 0.007        |
| Bond angles                            | 1.012                                   | 1.260                                  | 0.915        |
| Number of solvent molecules            | 157                                     | 316                                    | 69           |

Numbers in parenthesis are those for the high-resolution shell.

**Table S8. Training set: Experimentally determined vs. predicted product chain length**

| GI        | PDB ID | Experiment                                                       | Source | Prediction (flexible)                                       |                                                             |
|-----------|--------|------------------------------------------------------------------|--------|-------------------------------------------------------------|-------------------------------------------------------------|
|           |        |                                                                  |        | E <sub>bind</sub> /MMGBSA                                   | E <sub>LJ</sub>                                             |
| 158979013 | 3KRF   | C <sub>10</sub>                                                  | (13)   | C <sub>15</sub>                                             | C <sub>15</sub>                                             |
| 24111799  | 1RQI   | C <sub>15</sub>                                                  | (14)   | C <sub>15</sub>                                             | C <sub>15</sub>                                             |
| 116333612 | 3PDE   | C <sub>15</sub> *                                                | EFI    | C <sub>20</sub>                                             | C <sub>15</sub>                                             |
| 15645545  | 3Q1O   | C <sub>15</sub> /C <sub>20</sub> *                               | EFI    | C <sub>20</sub>                                             | C <sub>15</sub>                                             |
| 70732810  | 3P41   | C <sub>15</sub> /C <sub>20</sub> *, C <sub>15</sub> <sup>†</sup> | EFI    | C <sub>15</sub>                                             | C <sub>20</sub>                                             |
| 218766585 | 2E8W   | C <sub>20</sub>                                                  | (15)   | C <sub>25</sub>                                             | C <sub>25</sub>                                             |
| 23308904  | 3QQV   | C <sub>20</sub> *, C <sub>20</sub> <sup>†</sup>                  | EFI    | C <sub>≥30</sub>                                            | C <sub>20</sub>                                             |
| 319443461 | 3AQO   | C <sub>35</sub>                                                  | (16)   | C <sub>≥30</sub>                                            | C <sub>≥30</sub>                                            |
| 3915686   | 1UBW   | C <sub>35</sub> /C <sub>40</sub>                                 | (17)   | C <sub>≥30</sub>                                            | C <sub>≥30</sub>                                            |
| 16126352  | 3OYR   | C <sub>50</sub> -C <sub>60</sub> *                               | EFI    | C <sub>15</sub> <sup>‡</sup> /C <sub>≥30</sub> <sup>§</sup> | C <sub>20</sub> <sup>‡</sup> /C <sub>≥30</sub> <sup>§</sup> |

Energy functions are E<sub>bind</sub>/MMGBSA and E<sub>LJ</sub> in application with flexible protein side chains.

\*|IPP:DMAPP = 4:1.

<sup>†</sup>IPP: DMAPP = 1:1.

<sup>‡</sup>Crystal structure of 3OY.

<sup>§</sup>Relaxed crystal structure of 3OYR.

**Table S9. Experimentally determined, predicted, and sequence-derived (TrEMBL) product chain length of *E*-PTS sequences of set targets<sub>known</sub>**

| GI        | Experiment                       |                 | Predicted        | Template | Type | Sequence. identity | TrEMBL                   |
|-----------|----------------------------------|-----------------|------------------|----------|------|--------------------|--------------------------|
|           | IPP:DMAPP = 4:1                  | IPP:DMAPP = 1:1 |                  |          |      |                    |                          |
| 77862362  | C <sub>50</sub> /C <sub>55</sub> |                 | C <sub>25</sub>  | 3MZV     | Apo  | 100                | C <sub>50</sub>          |
| 293372070 | C <sub>15</sub>                  |                 | C <sub>15</sub>  | 3LV5     | Apo  | 100                | C <sub>15</sub>          |
| 19551716  | C <sub>45</sub> /C <sub>50</sub> |                 | C <sub>25</sub>  | 3Q2Q     | Holo | 100                | C <sub>20</sub>          |
| 21225056  | C <sub>15</sub> /C <sub>20</sub> | C <sub>15</sub> | C <sub>20</sub>  | 3NF2     | Apo  | 100                | Polyprenyl synthase      |
| 15640906  | C <sub>15</sub> /C <sub>20</sub> |                 | C <sub>15</sub>  | 3P8R     | Apo  | 100                | C <sub>15</sub>          |
| 29375563  | C <sub>15</sub> /C <sub>20</sub> | C <sub>15</sub> | C <sub>15</sub>  | 3P8L     | Apo  | 100                | C <sub>15</sub>          |
| 52842540  | C <sub>20</sub> <sup>a</sup>     | C <sub>20</sub> | C <sub>20</sub>  | 3LOM     | Apo  | 100                | C <sub>15</sub>          |
| 57238655  | C <sub>15</sub> /C <sub>20</sub> | C <sub>15</sub> | C <sub>20</sub>  | 3NPK     | Apo  | 100                | C <sub>15</sub>          |
| 116334218 | C <sub>45</sub> /C <sub>50</sub> |                 | C <sub>≥30</sub> | 3PKO     | Apo  | 100                | C <sub>20</sub>          |
| 8272412   | C <sub>15</sub>                  |                 | C <sub>15</sub>  | 3LV5     | Apo  | 95                 | C <sub>15</sub>          |
| 77464324  | C <sub>50</sub> /C <sub>55</sub> |                 | C <sub>25</sub>  | 3MZV     | Apo  | 78                 | C <sub>20</sub>          |
| 67866738  | C <sub>50</sub>                  |                 | C <sub>25</sub>  | 3MZV     | Apo  | 53                 | C <sub>50</sub>          |
| 39934115  | C <sub>50</sub>                  |                 | C <sub>25</sub>  | 3MZV     | Apo  | 52                 | C <sub>40</sub>          |
| 125624487 | C <sub>20</sub>                  | C <sub>15</sub> | C <sub>20</sub>  | 1RTR     | Apo  | 51                 | C <sub>15</sub>          |
| 16126308  | C <sub>15</sub>                  |                 | C <sub>20</sub>  | 3LV5     | Apo  | 47                 | C <sub>15</sub>          |
| 118468511 | C <sub>20</sub>                  |                 | C <sub>20</sub>  | 3QQV     | Holo | 46                 | Polyprenyl synthase      |
| 148993815 | C <sub>20</sub>                  | C <sub>20</sub> | C <sub>20</sub>  | 1RTR     | Apo  | 46                 | FPP/GGPP synthase family |
| 16131077  | C <sub>45</sub> /C <sub>50</sub> |                 | C <sub>25</sub>  | 3MZV     | Apo  | 46                 | C <sub>40</sub>          |
| 15640461  | C <sub>40</sub> /C <sub>45</sub> |                 | C <sub>20</sub>  | 3OYR     | Holo | 45                 | C <sub>40</sub>          |
| 104774286 | C <sub>15</sub>                  |                 | C <sub>15</sub>  | 3PDE     | Holo | 44                 | C <sub>20</sub>          |
| 21223617  | C <sub>15</sub> /C <sub>20</sub> | C <sub>15</sub> | C <sub>25</sub>  | 3NF2     | Apo  | 44                 | Polyprenyl synthase      |
| 29376566  | C <sub>50</sub> /C <sub>55</sub> |                 | C <sub>25</sub>  | 3PKO     | Apo  | 44                 | C <sub>35</sub>          |
| 52842862  | C <sub>60</sub> /C <sub>65</sub> |                 | C <sub>25</sub>  | 3MZV     | Apo  | 44                 | C <sub>40</sub>          |
| 21227869  | C <sub>15</sub> /C <sub>20</sub> | C <sub>20</sub> | C <sub>25</sub>  | 1WY0     | Apo  | 43                 | C <sub>10</sub>          |
| 21218742  | C <sub>20</sub> /C <sub>25</sub> |                 | C <sub>20</sub>  | 3QQV     | Holo | 41                 | C <sub>20</sub>          |
| 58337602  | C <sub>15</sub>                  |                 | C <sub>15</sub>  | 3PDE     | Holo | 40                 | C <sub>20</sub>          |
| 34540567  | C <sub>15</sub> /C <sub>20</sub> | C <sub>15</sub> | C <sub>15</sub>  | 1WY0     | Apo  | 39                 | Polyprenyl synthase      |
| 57833856  | C <sub>20</sub> /C <sub>25</sub> | C <sub>25</sub> | C <sub>25</sub>  | 3QQV     | Holo | 39                 | Polyprenyl synthase      |
| 60682991  | C <sub>50</sub>                  |                 | C <sub>15</sub>  | 1WY0     | Apo  | 39                 | FPP/GGPP synthase family |
| 29348670  | C <sub>50</sub> /C <sub>55</sub> |                 | C <sub>25</sub>  | 3MZV     | Apo  | 38                 | C <sub>40</sub>          |
| 153799383 | C <sub>15</sub>                  | C <sub>10</sub> | C <sub>≥30</sub> | 3QQV     | Holo | 36                 | FPP/GGPP synthase family |
| 39934591  | C <sub>20</sub>                  | C <sub>20</sub> | C <sub>20</sub>  | 3Q10     | Holo | 36                 | C <sub>20</sub>          |
| 53711383  | C <sub>50</sub> /C <sub>55</sub> |                 | C <sub>≥30</sub> | 3MZV     | Apo  | 36                 | C <sub>40</sub>          |
| 23308797  | C <sub>20</sub> /C <sub>25</sub> | C <sub>20</sub> | C <sub>15</sub>  | 3QQV     | Holo | 34                 | C <sub>20</sub>          |

**Table S10. Experimentally determined, predicted, and sequence-derived (TrEMBL) product chain length of *E*-PTS sequences of set targets<sub>blind</sub>**

| GI        | Experiment                       |                                  | Predicted        | Template | Type | Sequence identity (%) | TrEMBL                           |
|-----------|----------------------------------|----------------------------------|------------------|----------|------|-----------------------|----------------------------------|
|           | IPP:DMAPP = 4:1                  | IPP:DMAPP = 1:1                  |                  |          |      |                       |                                  |
| 53804815  | C <sub>15</sub>                  |                                  | C <sub>15</sub>  | 3TS7     | Apo  | 100                   | C <sub>15</sub>                  |
| 18310802  | C <sub>15</sub>                  |                                  | C <sub>15</sub>  | 3UCA     | Apo  | 100                   | C <sub>15</sub>                  |
| 55979982  | C <sub>20</sub>                  |                                  | C <sub>15</sub>  | 1WMW     | Apo  | 100                   | C <sub>20</sub>                  |
| 15642935  | C <sub>20</sub>                  |                                  | C <sub>20</sub>  | 2FTZ     | Apo  | 100                   | C <sub>15</sub>                  |
| 34557991  | C <sub>15</sub>                  |                                  | C <sub>15</sub>  | 3Q1O     | Holo | 56                    | C <sub>20</sub>                  |
| 28378303  | C <sub>15</sub>                  |                                  | C <sub>15</sub>  | 3PDE     | Holo | 56                    | Polyprenyl synthase              |
| 15837263  | C <sub>15</sub>                  |                                  | C <sub>15</sub>  | 1RQI     | Holo | 54                    | C <sub>15</sub>                  |
| 87120692  | C <sub>15</sub>                  |                                  | C <sub>15</sub>  | 1RQI     | Holo | 53                    | C <sub>15</sub>                  |
| 28377915  | C <sub>30</sub>                  |                                  | C <sub>20</sub>  | 3PKO     | Apo  | 52                    | C <sub>35</sub>                  |
| 33600896  | C <sub>15</sub>                  |                                  | C <sub>20</sub>  | 1RQI     | Holo | 51                    | C <sub>15</sub>                  |
| 291005007 | C <sub>15</sub>                  |                                  | C <sub>20</sub>  | 3NF2     | Apo  | 50                    | C <sub>10</sub>                  |
| 152991761 | C <sub>15</sub>                  |                                  | C <sub>15</sub>  | 3Q1O     | Holo | 49                    | C <sub>15</sub>                  |
| 300633355 | C <sub>15</sub>                  |                                  | C <sub>20</sub>  | 1RQI     | Holo | 48                    | C <sub>15</sub>                  |
| 17546941  | C <sub>15</sub>                  |                                  | C <sub>15</sub>  | 1RQI     | Holo | 47                    | C <sub>15</sub>                  |
| 29831407  | C <sub>45</sub>                  |                                  | C <sub>≥30</sub> | 3Q2Q     | Apo  | 47                    | Polyprenyl synthase              |
| 46579760  | C <sub>15</sub>                  |                                  | C <sub>15</sub>  | 3PDE     | Holo | 46                    | C <sub>20</sub>                  |
| 56551751  | C <sub>15</sub> /C <sub>20</sub> | C <sub>15</sub>                  | C <sub>15</sub>  | 1RQI     | Holo | 45                    | Polyprenyl synthase              |
| 16800468  | C <sub>15</sub>                  |                                  | C <sub>15</sub>  | 3PDE     | Holo | 43                    | FPP/GGPP synthase family         |
| 68489506  | C <sub>20</sub>                  | C <sub>20</sub>                  | C <sub>20</sub>  | 2E8W     | Holo | 43                    | FPP/GGPP synthase family         |
| 40062988  | C <sub>20</sub>                  | C <sub>20</sub>                  | C <sub>25</sub>  | 3P8R     | Apo  | 43                    | C <sub>20</sub>                  |
| 50309979  | C <sub>25</sub>                  | C <sub>25</sub>                  | C <sub>25</sub>  | 2E8W     | Holo | 42                    | FPP/GGPP synthase family         |
| 149238027 | C <sub>20</sub>                  | C <sub>20</sub>                  | C <sub>20</sub>  | 2E8W     | Holo | 42                    | FPP/GGPP synthase family         |
| 154483652 | C <sub>15</sub>                  |                                  | C <sub>15</sub>  | 3PDE     | Holo | 42                    | FPP/GGPP synthase family         |
| 254302823 | C <sub>15</sub>                  |                                  | C <sub>15</sub>  | 1RQI     | Holo | 42                    | C <sub>10</sub>                  |
| 83945403  | C <sub>15</sub> /C <sub>20</sub> | C <sub>15</sub>                  | C <sub>20</sub>  | 1RQI     | Holo | 40                    | C <sub>15</sub>                  |
| 63034220  | C <sub>20</sub>                  | C <sub>20</sub>                  | C <sub>20</sub>  | 3KRF     | Holo | 40                    | C <sub>20</sub>                  |
| 11499146  | C <sub>35</sub> /C <sub>40</sub> |                                  | C <sub>25</sub>  | 3OYR     | Holo | 38                    | C <sub>40</sub>                  |
| 15805956  | C <sub>40</sub>                  |                                  | C <sub>25</sub>  | 3OYR     | Holo | 38                    | Polyprenyl synthase              |
| 58578715  | C <sub>55</sub> /C <sub>60</sub> |                                  | C <sub>25</sub>  | 3OYR     | Holo | 37                    | C <sub>40</sub>                  |
| 83764459  | C <sub>15</sub> /C <sub>20</sub> | C <sub>15</sub> /C <sub>20</sub> | C <sub>25</sub>  | 2E8W     | Holo | 36                    | C <sub>20</sub>                  |
| 83594313  | C <sub>20</sub> /C <sub>25</sub> | C <sub>20</sub>                  | C <sub>20</sub>  | 3PDE     | Holo | 36                    | C <sub>15</sub>                  |
| 154151748 | C <sub>20</sub>                  | C <sub>20</sub>                  | C <sub>25</sub>  | 3OYR     | Holo | 36                    | C <sub>20</sub>                  |
| 58584994  | C <sub>15</sub>                  |                                  | C <sub>15</sub>  | 3PDE     | Holo | 36                    | C <sub>20</sub>                  |
| 29829539  | C <sub>15</sub> /C <sub>20</sub> | C <sub>15</sub>                  | C <sub>20</sub>  | 3OYR     | Holo | 35                    | Polyprenyl synthase              |
| 21673095  | C <sub>20</sub>                  | C <sub>20</sub>                  | C <sub>20</sub>  | 3OYR     | Holo | 34                    | Isoprenyl synthase               |
| 16081558  | C <sub>35</sub> /C <sub>40</sub> |                                  | C <sub>20</sub>  | 3OYR     | Holo | 33                    | C <sub>10</sub> /C <sub>15</sub> |
| 29840764  | C <sub>40</sub> -C <sub>60</sub> |                                  | C <sub>15</sub>  | 3PDE     | Holo | 32                    | C <sub>15</sub>                  |
| 126458776 | C <sub>20</sub>                  |                                  | C <sub>20</sub>  | 3OYR     | Holo | 32                    | Polyprenyl synthase              |
| 24215915  | C <sub>40</sub>                  |                                  | C <sub>25</sub>  | 3OYR     | Holo | 29                    | C <sub>20</sub>                  |
| 126460364 | C <sub>35</sub>                  |                                  | C <sub>25</sub>  | 3AQ0     | Holo | 29                    | Polyprenyl synthase              |

## Other Supporting Information Files

[Dataset S1 \(PDF\)](#)
